# Supplementary material for: Positive peritoneal lavage fluid cytology based on isolation by size of epithelial tumor cells indicates a high risk of peritoneal metastasis
Source: PeerJ. 2024 Jun 28;12:e17602. doi: 10.7717/peerj.17602 (PMC11216200; doi:10.7717/peerj.17602)
Supplement: Supplemental Information 7 [file peerj-12-17602-s007.xlsx]

## Sheet: data
Number	Sex	Age(years)	T	N	M	pTNM stage	Venous invasion	Nerve invasion
1	Male	69	T4a	N1	M0	Stage IIIA	No	No
2	Female	70	T4a	N1	M0	Stage IIIA	No	No
3	Male	54	T3	N3b	M0	Stage IIIC	Yes	No
4	Male	82	T4b	N0	M0	Stage IIIA	No	No
5	Male	60	T3	N2	M0	Stage IIIA	Yes	No
6	Male	74	T4a	N2	M1	Stage IV	Yes	Yes
7	Female	68	T4a	N1	M0	Stage IIIA	Yes	No
8	Male	66	T4a	N3a	M0	Stage IIIB	Yes	Yes
9	Male	68	T3	N0	M0	Stage IIA	No	No
10	Female	76	T4a	N3b	M0	Stage IIIC	Yes	Yes
11	Female	77	T1	N0	M0	Stage IA	No	No
12	Male	65	T4a	N1	M0	Stage IIIA	Yes	Yes
13	Male	57	T4a	N0	M0	Stage IIB	Yes	Yes
14	Male	64	T4a	N2	M0	Stage IIIA	Yes	Yes
15	Female	73	T4a	N0	M0	Stage IIB	Yes	Yes
16	Male	65	T4a	N1	M0	Stage IIIA	Yes	Yes
17	Male	74	T4a	N3b	M0	Stage IIIC	Yes	Yes
18	Male	67	T1	N0	M0	Stage IA	No	No
19	Male	64	T4a	N0	M0	Stage IIB	No	No
20	Male	71	T4a	N3b	M0	Stage IIIC	Yes	Yes
21	Male	80	T4a	N1	M0	Stage IIIA	Yes	Yes
22	Male	65	T4a	N0	M0	Stage IIB	No	No
23	Male	55	T1	N0	M0	Stage IA	No	No
24	Male	73	T3	N1	M0	Stage IIB	Yes	Yes
25	Male	74	T4a	N3a	M0	Stage IIIC	No	Yes
26	Female	77	T4a	N1	M0	Stage IIIA	No	Yes
27	Female	69	T4a	N1	M0	Stage IIIA	No	No
28	Male	55	T3	N3b	M0	Stage IIIC	Yes	No
29	Male	80	T4b	N0	M0	Stage IIIA	No	No
30	Male	58	T3	N2	M0	Stage IIIA	Yes	No
31	Male	76	T4a	N2	M1	Stage IV	Yes	Yes
32	Female	69	T4a	N1	M0	Stage IIIA	Yes	No
33	Male	64	T4a	N3a	M0	Stage IIIB	Yes	Yes
34	Male	68	T3	N0	M0	Stage IIA	No	No
35	Female	79	T1	N0	M0	Stage IA	No	No
36	Male	67	T4a	N1	M0	Stage IIIA	Yes	Yes
37	Male	62	T4a	N0	M0	Stage IIB	Yes	Yes
38	Male	61	T4a	N2	M0	Stage IIIA	Yes	Yes
39	Female	72	T4a	N0	M0	Stage IIB	Yes	Yes
40	Male	64	T4a	N1	M0	Stage IIIA	Yes	Yes
41	Male	73	T4a	N3b	M0	Stage IIIC	Yes	Yes
42	Male	70	T1	N0	M0	Stage IA	No	No
43	Male	60	T4a	N0	M0	Stage IIB	No	No
44	Male	73	T4a	N3b	M0	Stage IIIC	Yes	Yes
45	Male	78	T4a	N1	M0	Stage IIIA	Yes	Yes
46	Male	63	T4a	N0	M0	Stage IIB	No	No
47	Male	54	T1	N0	M0	Stage IA	No	No
48	Male	75	T3	N1	M0	Stage IIB	Yes	Yes
49	Male	78	T4a	N3a	M0	Stage IIIC	No	Yes
50	Female	75	T4a	N1	M0	Stage IIIA	No	Yes
